# Supplementary material for: Identifying Who Engages in Sustainable Adaptation in Large-Scale Commodity Agriculture
Source: Research Square preprint supplement (doi:10.21203/rs.3.rs-936827/v1), 2021-10-04
Supplement: Supplementary file 1 [file 48ce7550349888c4adcd84b1.docx]

**Online Resource 3:** Full correlation table of all the variables in the analysis
